# Supplementary material for: Fête du Sou des Ecoles et du Village - Montbonnot
Source: Royal Society of Chemistry journal article supplement (doi:10.1039/c9ra06286f), 2010-06-09
Supplement: c9ra06286f1.pdf [file c9ra06286f1.pdf]

Supporting Information

**Hot Nitric Acid Diffuse in Fluoroelastomer Composite and its Degradation**

*Hailan Kang,<sup>1,2,\*</sup> Long Chen,<sup>1</sup> Hongyang Du,<sup>1</sup> Haoyu Wang,<sup>1</sup> Donghan Li,<sup>1,2</sup>*

*Qinghong Fang<sup>1,2,\*</sup>*

<sup>1</sup> College of Materials Science and Engineering, Shenyang University of Chemical  
Technology, Shenyang, 110142, China

<sup>2</sup> Liaoning Provincial Key Laboratory of Rubber & Elastomer, Shenyang University  
of Chemical Technology, Shenyang 110142, China

## 1. NMR

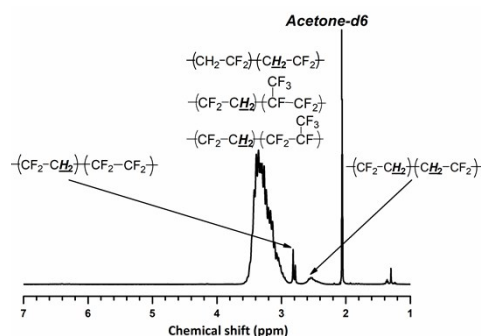

Figure S1  $^1\text{H}$ -NMR spectrum of fluoroelastomer in acetone- $d_6$ .

The  $^1\text{H}$ -NMR spectrum of fluoroelastomer shows the presence of the multiplets at 3.55~2.70 ppm assigned to methylene groups of  $-\text{CF}_2\text{CH}_2-\text{CF}_2\text{CH}_2-$ ,  $-\text{CF}_2\text{CH}_2-\text{CF}_2-\text{CF}(\text{CF}_3)-$ ,  $-\text{CF}_2\text{CH}_2-\text{CF}(\text{CF}_3)\text{CF}_2-$  and  $-\text{CF}_2\text{CH}_2-\text{CF}_2\text{CF}_2-$  sequence resulting from VDF-VDF, VDF-HFP and VDF-TFE additions, respectively. Actually, tail-to-tail VDF addition ( $-\text{CF}_2\text{CH}_2-\text{CH}_2\text{CF}_2-$ ) is also identified by the presence of the peak centered at 2.53 ppm assigned to both methylene groups in a role (as an inversed addition).

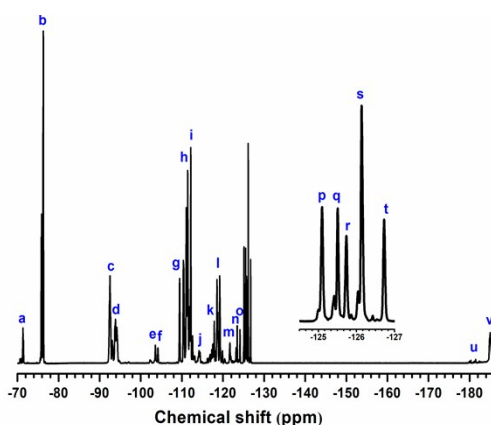

Figure S2  $^{19}\text{F}$ -NMR spectrum of fluoroelastomer

As shown in Figure S2, the multiplets at -70~-76 (a, b), -117~-120 (l) and -180~-185 ppm (u, v) assigned to  $-\text{CF}_3$ ,  $-\text{CF}_2-$  and  $-\text{CF}$  from HFP sequences, respectively;

the multiplets at -91~-117 ppm (c~k) assigned to  $-\text{CF}_2-$  from VDF sequences; and the multiplets at -120~-126 ppm (m~t) assigned to  $-\text{CF}_2-$  from TFE sequences.

Thus the main sequences and structure of fluoroelastomer can be showed as Figure S3.

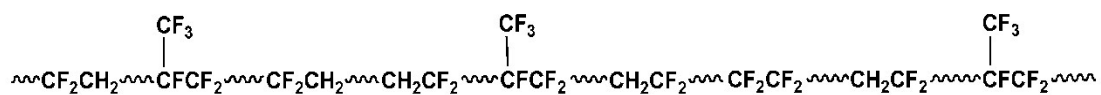

Figure S3 Structure of fluoroelastomer
